# Supplementary material
Source: PubMed Central journal article supplement (PMC10690446)
Supplement: EMBJ-42-e113104-s005.pdf [file EMBJ-42-e113104-s005.pdf]

# Appendix

## **RNase H2 degrades toxic RNA:DNA hybrids behind stalled forks to promote replication restart**

Jonathan Heuzé<sup>1\*</sup>, Samira Kemiha<sup>1\*</sup>, Antoine Barthe<sup>1</sup>, Alba Torán Vilarrubias<sup>1</sup>, Elyès Aouadi<sup>1</sup>, Umberto Aiello<sup>2,4</sup>, Domenico Libri<sup>2,5</sup>, Yea-Lih Lin<sup>1</sup>, Armelle Lengronne<sup>1</sup>, Jérôme Poli<sup>1,3</sup> and Philippe Pasero<sup>1</sup>

### Tables of contents:

Appendix Figures S1 to S3 and their legends

Figure S1: Analysis of RNA:DNA hybrids and nascent RNA around HU-arrested forks in budding yeast. (p2)

Figure S2: Depletion of RNase H2 induces a proliferation defect in HeLa cells. (p3)

Figure S3: Effect of DRB and triptolide transcription on EU incorporation in HeLa cells. (p4)

**A**

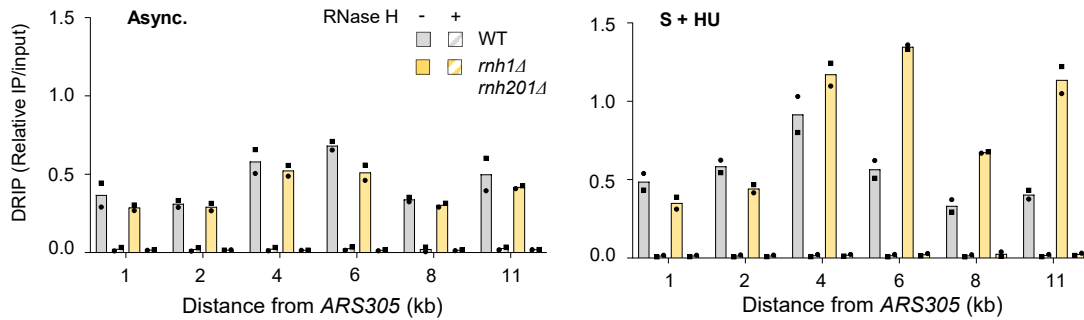

**B**

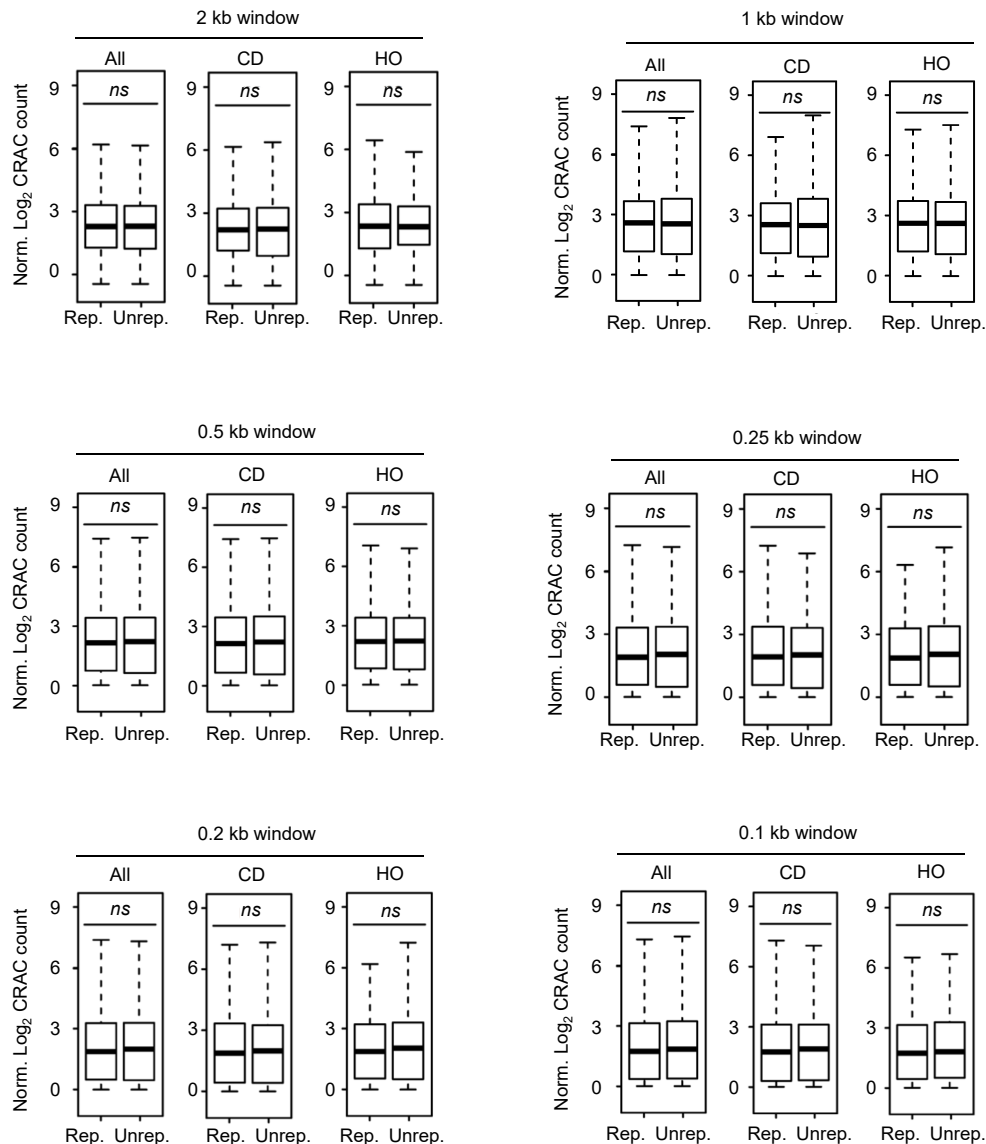

**Appendix Figure S1: Analysis of RNA:DNA hybrids and nascent RNA around HU-arrested forks in budding yeast.** (A) DRIP-qPCR analysis of RNA:DNA hybrid enrichment at loci positioned 1 to 11 kb away from *ARS305* in wild type and *rnh1Δ rnh201Δ* cells +/- *in vitro* RNase H treatment. Samples were collected from asynchronous cultures (async.) or from cells arrested in  $G_1$  with  $\alpha$ -factor and released for 90 minutes into S phase in the presence of 200 mM HU (S+HU). Data are expressed as a percentage of input. Individual points are indicated ( $n=2$ ). (B) Rpb1-HTP CRAC analysis of nascent RNA at HU-arrested forks. Boxplot comparisons of the  $\log_2$  Rpb1-HTP CRAC count computed over several windows (1, 0.5, 0.25, 0.2, 0.1 Kb) and normalized to the corresponding window size on replicated and unreplicated side of HU-arrested forks. Signal was measured for RNAPII transcribing in a co-directional (CD), head-on (HO) or both (all) configuration relative to the fork, as indicated. Untreated conditions from (Aiello *et al.*, 2022). *ns*:  $p > 0.05$ , t-test.

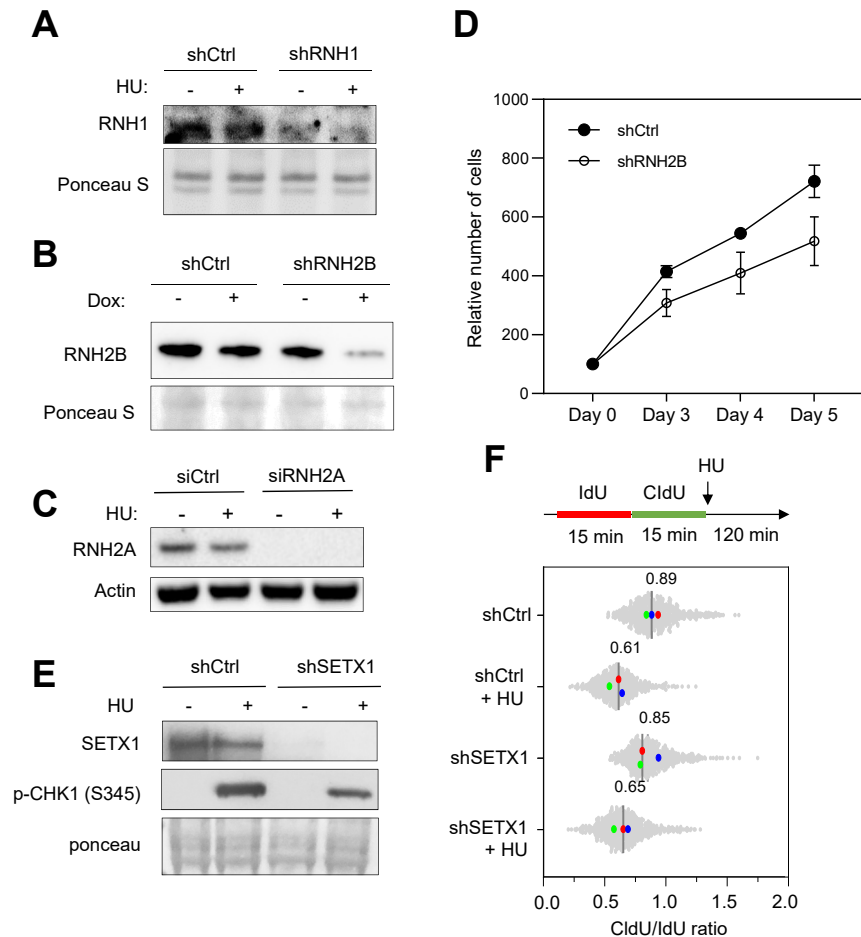

**Appendix Figure S2: Depletion of RNase H2 induces a proliferation defect in HeLa cells.** (A, B) Western blot analysis of the levels of RNase H1 and RNase H2B in HeLa cells expressing tetracycline-inducible shRNAs. Cells were treated with 10 µg/ml doxycycline for 72 hours. (C) Levels of RNase H2A in HeLa cells transfected for 48 hours with siRNA against RNase H2A (siRNH2A) or a control sequence (siCtrl) with or without exposure to 4 mM HU for 2 hours. Actin was used as a loading control. (D) Growth of control (shCtrl) and RNase H2B-depleted (shRNH2B) HeLa cells. Cell proliferation was quantified using WST-1 assay at indicated time points after doxycycline treatment (10 µg/ml). Cell number is expressed relative to the number of control cells at Day 0. (E-F) DNA fiber analysis of fork resection in control HeLa cells (shCtrl) and in HeLa cells depleted for SETX (shSETX1) and exposed or not to 4 mM HU. Cells were treated with doxycycline (4 µg/ml) for 72 hours and sequentially labelled for 15 min with IdU and for 15 min with CldU. Then, they were either collected immediately or treated for 2 h with 4 mM hydroxyurea (HU) before DNA fiber analysis. The lengths of the IdU and CldU tracks were plotted as the ratio of CldU to IdU. Mean of 3 independent experiments was indicated.

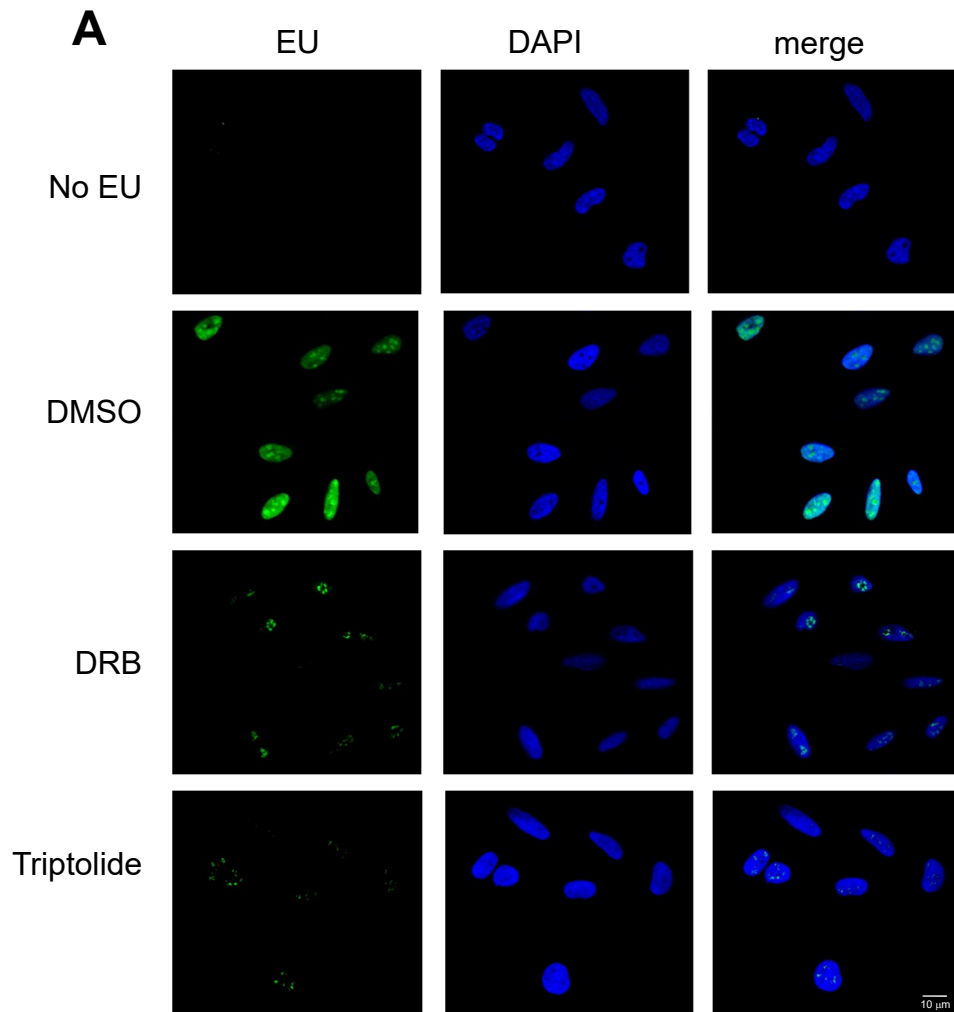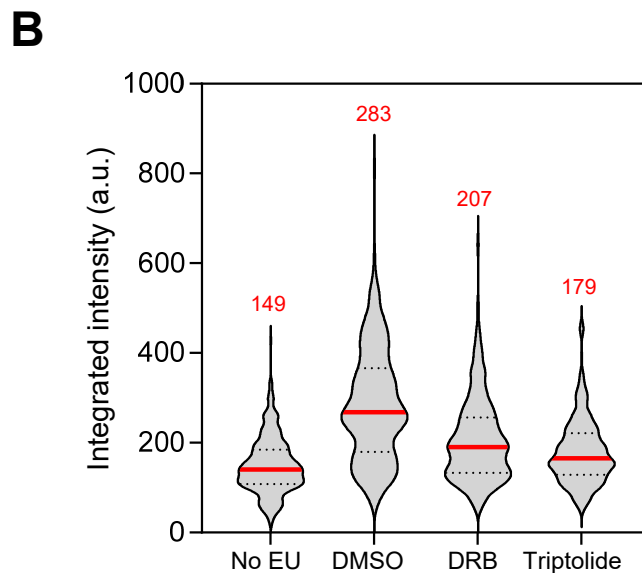

Appendix Figure S3: **Effect of DRB and triptolide transcription on EU incorporation in HeLa cells.** (A) Cells were treated with DMSO as control, 100  $\mu$ M DRB for 2.5 hours or 1  $\mu$ M triptolide for 1.5 hours before 100  $\mu$ M EU labeling for 30 min, as indicated in Fig. 6A. The EU signal was detected using click-it chemistry and fluorescence microscopy. Representative images of EU incorporation are shown. (B) EU signal of was quantified using CellProfiler. Median integrated intensity is indicated in red.
